# Supplementary material for: Raman spectral titration method: an informative technique for studying the complexation of uranyl with uranyl(vi)–DPA/oxalate systems as examples
Source: Royal Society of Chemistry journal article supplement (doi:10.1039/c7dt01631j), 2017-01-01
Supplement: c7dt01631j1.pdf [file c7dt01631j1.pdf]

Table S1 Samples for confirming Equation (1)

| Samples | $C_{\text{Uranyl}}$<br>(mol/L) | $C_{\text{nitrate}}$<br>(mol/L) | $C_{\text{perchlorate}}$<br>(mol/L) | Predicted<br>$C_{\text{Uranyl}}$ (mol/L) | Relative<br>error(%) |
|---------|--------------------------------|---------------------------------|-------------------------------------|------------------------------------------|----------------------|
| 1       | 0.152                          | 1                               | 0.52                                | 0.154                                    | 2                    |
| 2       | 0.1                            | 1.5                             | 0.34                                | 0.099                                    | -1                   |
| 3       | 0.5                            | 0.5                             | 1.71                                | 0.519                                    | 3.8                  |
| 4       | 0.1                            | 0.1                             | 0.34                                | 0.097                                    | 3                    |
| 5       | 0.4                            | 1                               | 1.37                                | 0.414                                    | 3.5                  |
| 6       | 0.3                            | 0.1                             | 1.03                                | 0.304                                    | 1.3                  |
| 7       | 0.3                            | 1.5                             | 1.03                                | 0.307                                    | 2.3                  |
| 8       | 0.2                            | 0.5                             | 0.68                                | 0.2                                      | 0                    |

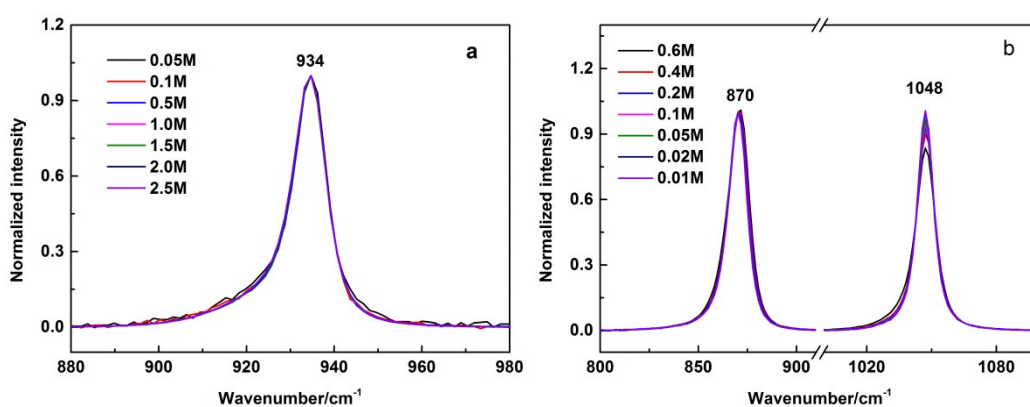

Figure S1 Raman spectra of perchloric acid normalized by intensity(a); Raman spectra of uranyl nitrate normalized by intensity of uranyl(b).

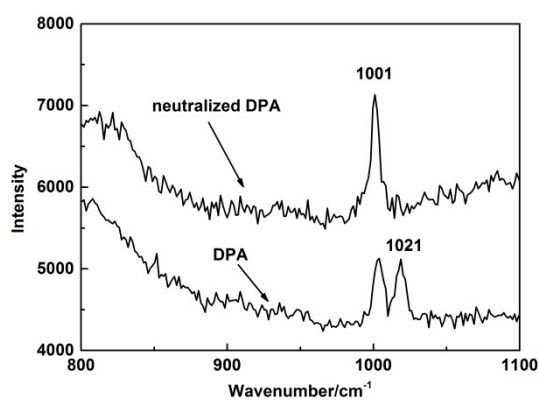

Figure S2. Raman spectra of DPA neutralized completely (upper) and dissolved directly. The concentration of DPA: 28 mM; Laser power: 20mW; Exposure time: 20s; Accumulation: 1 time
